# Supplementary material for: Nrf2 Promotes Inflammation in Early Myocardial Ischemia-Reperfusion via Recruitment and Activation of Macrophages
Source: PubMed Central journal article supplement (PMC8669137; doi:10.3389/fimmu.2021.763760), 2021-11-30
Supplement: Table_1.pdf [file Table_1.pdf]

**Table S1. Gene list of Ccr1<sup>+</sup> M1 macrophage signature**

| <b>Gene sets</b>                      | <b>Genes</b>                                                                                                                                                                                                                                            |
|---------------------------------------|---------------------------------------------------------------------------------------------------------------------------------------------------------------------------------------------------------------------------------------------------------|
| <b>Ccr1<sup>+</sup> M1 macrophage</b> | Ache, Adamdec1, Apol6, Aqp9, Arrb1, Ccl19, Ccl5, Ccl8, Ccr7, Cd38, Cd40, Cxcl10, Cxcl11, Cxcl13, Cxcl9, Dhx58, Ebi3, Ggt5, Hesx1, Idol1, Kynu, Lag3, Lamp3, Nod2, Ptgir, Rassf4, Rsad2, Siglec1, Slamf1, Soes1, Tlr7, Tlr8, Tnfaip6, Tnip3, Trpm4, Ccr1 |
