# Supplementary material for: Nrf2 Promotes Inflammation in Early Myocardial Ischemia-Reperfusion via Recruitment and Activation of Macrophages
Source: PubMed Central journal article supplement (PMC8669137; doi:10.3389/fimmu.2021.763760), 2021-11-30
Supplement: Table_2.pdf [file Table_2.pdf]

**Table S2. The proportion of immune cells infiltrating (%) according to ImmuCellAI-mouse.**

| id                      | GSM4874<br>400 | GSM487<br>4401 | GSM487<br>4402 | GSM487<br>4403 | GSM487<br>4404 | GSM487<br>4405 | GSM487<br>4406 | GSM487<br>4407 |
|-------------------------|----------------|----------------|----------------|----------------|----------------|----------------|----------------|----------------|
| B_cell_cells            | 5.93           | 4.79           | 5.2            | 8.73           | 1.69           | 3.54           | 1.72           | 2.13           |
| Dendritic_cells_cells   | 21.92          | 23.41          | 23.78          | 23.49          | 20.77          | 19.78          | 20.8           | 19.54          |
| Granulocytes_cells      | 22.86          | 24.27          | 20.86          | 24.3           | 25.53          | 25.53          | 27.16          | 26.04          |
| Macrophage_cells        | 3.72           | 4.41           | 3.74           | 3.56           | 7.14           | 7.02           | 9.7            | 8.58           |
| Monocytes_cells         | 0.68           | 0.54           | 1.46           | 0.7            | 10.31          | 6.15           | 6.57           | 8.63           |
| NK_cells                | 25.12          | 21.74          | 24.49          | 21.23          | 16.38          | 22.3           | 20.7           | 19.02          |
| T_cell_cells            | 19.77          | 20.83          | 20.48          | 18             | 18.18          | 15.68          | 13.35          | 16.06          |
| CD4_T_cell_cells        | 9.04           | 9.52           | 9.58           | 7.92           | 8.28           | 6.97           | 6.08           | 6.73           |
| CD8_T_cell_cells        | 4.28           | 4.08           | 4.24           | 4              | 2.93           | 2.54           | 2.36           | 2.82           |
| NKT_cells               | 4.45           | 4.56           | 3.86           | 4.11           | 5.04           | 4.41           | 4.22           | 4.81           |
| Tgd_cells               | 1.99           | 2.67           | 2.8            | 1.98           | 1.93           | 1.77           | 0.7            | 1.7            |
| B1_cell_cells           | 1.55           | 1.27           | 1.4            | 2.16           | 0.5            | 1.05           | 0.51           | 0.64           |
| Follicular_B_cells      | 0.48           | 0.09           | 0.2            | 0.3            | 0.03           | 0.09           | 0.08           | 0.08           |
| Germinal_center_B_cells | 0.86           | 0.74           | 0.76           | 1.54           | 0.26           | 0.49           | 0.24           | 0.27           |
| Marginal_Zone_B_cells   | 0.79           | 0.59           | 0.76           | 1.2            | 0.25           | 0.56           | 0.22           | 0.27           |
| Memory_B_cells          | 1.06           | 1              | 0.94           | 1.82           | 0.31           | 0.63           | 0.32           | 0.4            |
| Plasma_cell_cells       | 1.18           | 1.1            | 1.13           | 1.71           | 0.34           | 0.72           | 0.35           | 0.47           |
| cDC1_cells              | 17.35          | 15.48          | 14.53          | 17.51          | 9.47           | 8.68           | 9.08           | 8.54           |
| cDC2_cells              | 0.33           | 1.7            | 1.2            | 0.05           | 2.22           | 1.92           | 2.37           | 1.72           |
| MoDC_cells              | 3.15           | 4.16           | 5.99           | 3.97           | 6.15           | 6.25           | 6.27           | 6.07           |
| pDC_cells               | 1.09           | 2.08           | 2.06           | 1.96           | 2.92           | 2.93           | 3.08           | 3.21           |
| Basophil_cells          | 6.6            | 6.66           | 5.85           | 6.22           | 5.63           | 6.85           | 6.28           | 6.75           |
| Eosinophil_cells        | 4.73           | 4.35           | 4.01           | 3.72           | 3.81           | 3.65           | 3.89           | 4.21           |

|                          |      |       |      |       |       |      |      |       |
|--------------------------|------|-------|------|-------|-------|------|------|-------|
| mast_cell_cells          | 1.77 | 1.73  | 1.89 | 3.59  | 1.07  | 1.34 | 1.78 | 1.2   |
| Neutrophils_cells        | 9.77 | 11.53 | 9.11 | 10.77 | 15.02 | 13.7 | 15.2 | 13.88 |
| M1_macrophage_cells      | 1.48 | 2.38  | 1.75 | 1.31  | 4.74  | 4.59 | 7.24 | 6.36  |
| M2_macrophage_cells      | 2.24 | 2.03  | 1.99 | 2.25  | 2.4   | 2.43 | 2.46 | 2.22  |
| CD4_Tm_cells             | 1.93 | 2.03  | 2.05 | 1.69  | 1.77  | 1.49 | 1.3  | 1.44  |
| Naive_CD4_T_cells        | 2.62 | 2.76  | 2.77 | 2.29  | 2.4   | 2.02 | 1.76 | 1.95  |
| T_helper_cell_cells      | 4.03 | 4.24  | 4.27 | 3.53  | 3.69  | 3.11 | 2.71 | 3     |
| Treg_cells               | 0.46 | 0.49  | 0.49 | 0.4   | 0.42  | 0.36 | 0.31 | 0.34  |
| CD8_Tc_cells             | 0.68 | 0.65  | 0.68 | 0.64  | 0.47  | 0.41 | 0.38 | 0.45  |
| CD8_Tcm_cells            | 1.27 | 1.21  | 1.26 | 1.19  | 0.87  | 0.75 | 0.7  | 0.83  |
| CD8_Tem_cells            | 1.32 | 1.26  | 1.31 | 1.23  | 0.9   | 0.78 | 0.73 | 0.87  |
| CD8_Tex_cells            | 0.72 | 0.69  | 0.72 | 0.67  | 0.49  | 0.43 | 0.4  | 0.47  |
| Naive_CD8_T_cells        | 0.29 | 0.27  | 0.29 | 0.27  | 0.2   | 0.17 | 0.16 | 0.19  |
| Infiltration_score_cells | 19.1 | 10    | 17.2 | 13    | 41.2  | 42.9 | 46.6 | 23.1  |
